# Supplementary material for: Benefits of Polydopamine as Particle/Matrix Interface in Polylactide/PD-BaSO4 Scaffolds
Source: MDPI journal article supplement (doi:10.3390/ijms21155480), 2020-07-31
Supplement: s1 [file s1]

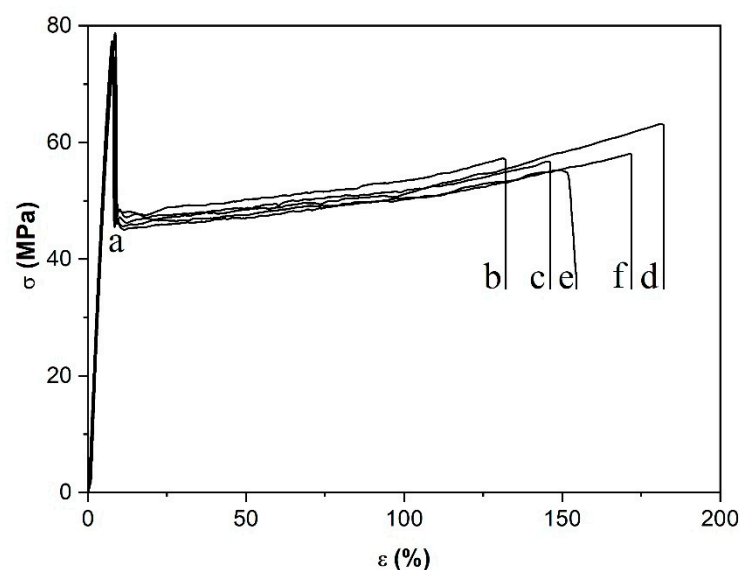

**Figure S1.** Tensile stress–strain curves of bulk materials (a) unfilled PLA, and PLA composites with (b) 0.5, (c) 1.0, (d) 2.0, (e) 5.0 and (f) 10.0 wt.% PD-BaSO<sub>4</sub>.

The increase in elongation is given by the amount of particle in the composite, obtaining a maximum elongation for the 2 wt.% composition. Despite increasing the ductility of the material, the strength is not affected.

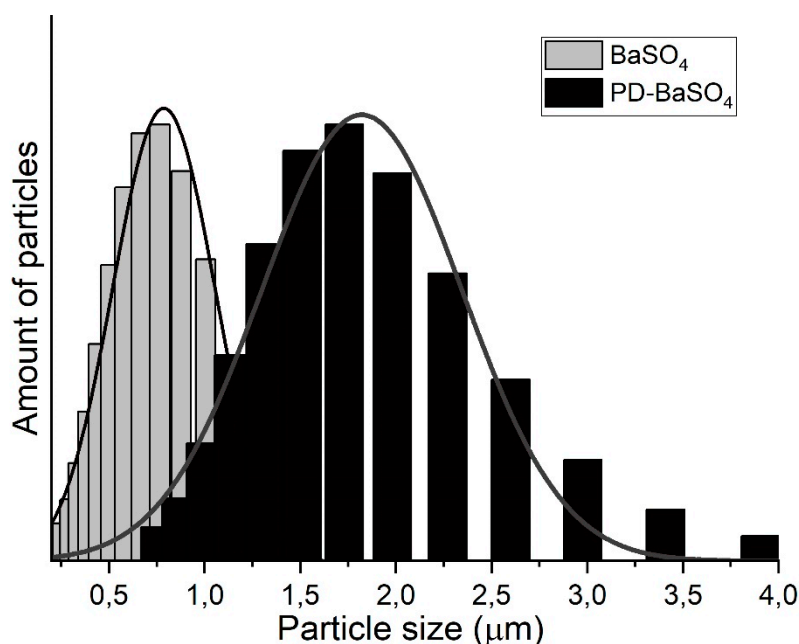

**Figure S2.** Particle size of BaSO<sub>4</sub> (Grey) and PD-BaSO<sub>4</sub> (black)

In the case of BaSO<sub>4</sub>, a particle size between 0–2 μm is determined, with a maximum of 0.75–1 μm, that expresses the average size. As expected, the polydopamine (PD) coated particles present a distribution of particle sizes displaced to higher values and showing a maximum between 1.5–2 μm.

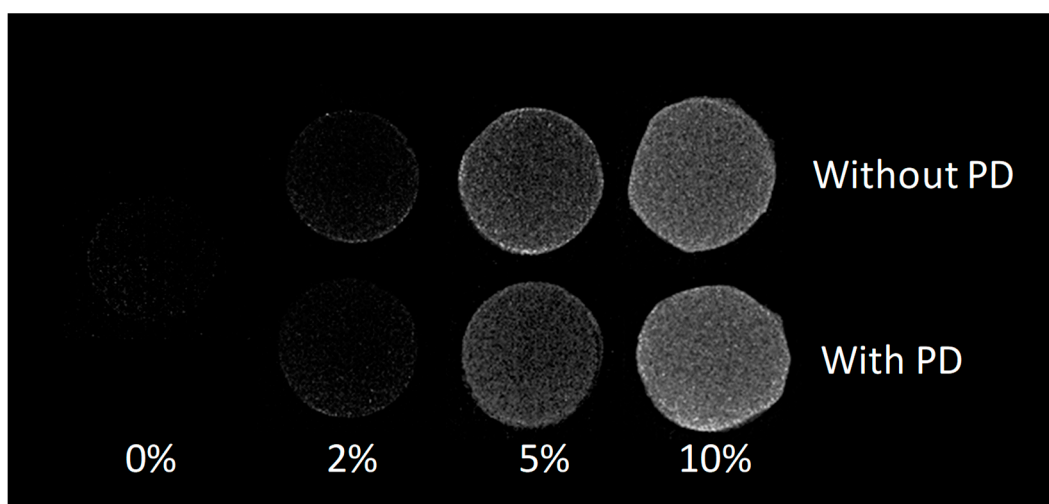

**Figure S3.** X-radiographies for neat PLA, PLA/BaSO<sub>4</sub> and PLA/PD-BaSO<sub>4</sub> composites with 2, 5 and 10 wt. % of BaSO<sub>4</sub> and PD-BaSO<sub>4</sub>

It is observed how barium sulfate provides radiopacity to neat PLA, and how the polydopamine coating is not affecting the radiopacity level. In both cases, it is seen that above 5 wt. % BaSO<sub>4</sub> and PD-BaSO<sub>4</sub> polylactide composites express adequate radiopacity, thus for a clinical application clinical application 10 wt. % BaSO<sub>4</sub> PLA composites will be preferred.

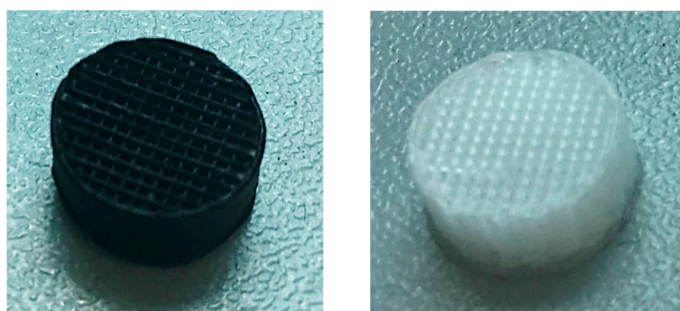

**Figure S4.** PLA/PD-BaSO<sub>4</sub> (left) and neat PLA (right) 3D-printed cylindric scaffolds for compression tests.

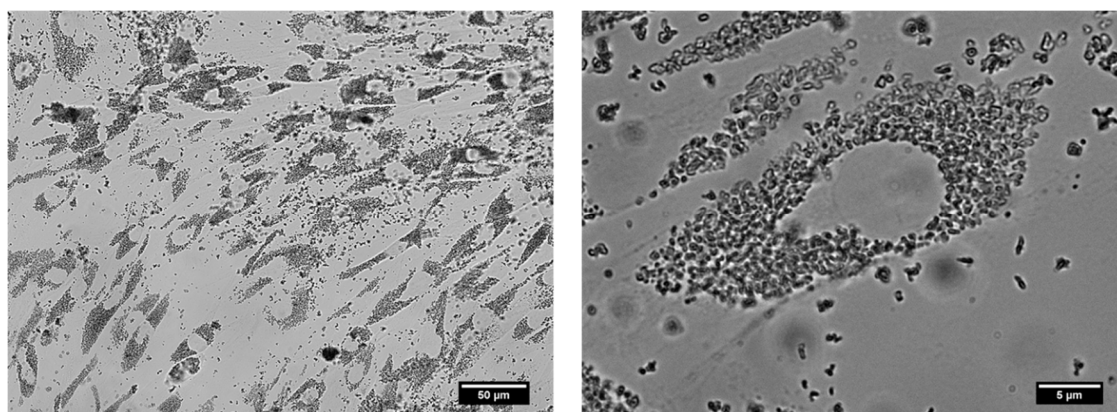

**Figure S5.** HDFs seeded in the presence of 500 µg/ml of BaSO<sub>4</sub>.

The morphology of the cells does not change despite being in contact with the barium sulfate particles, therefore it is suggested the internalization of the particles.

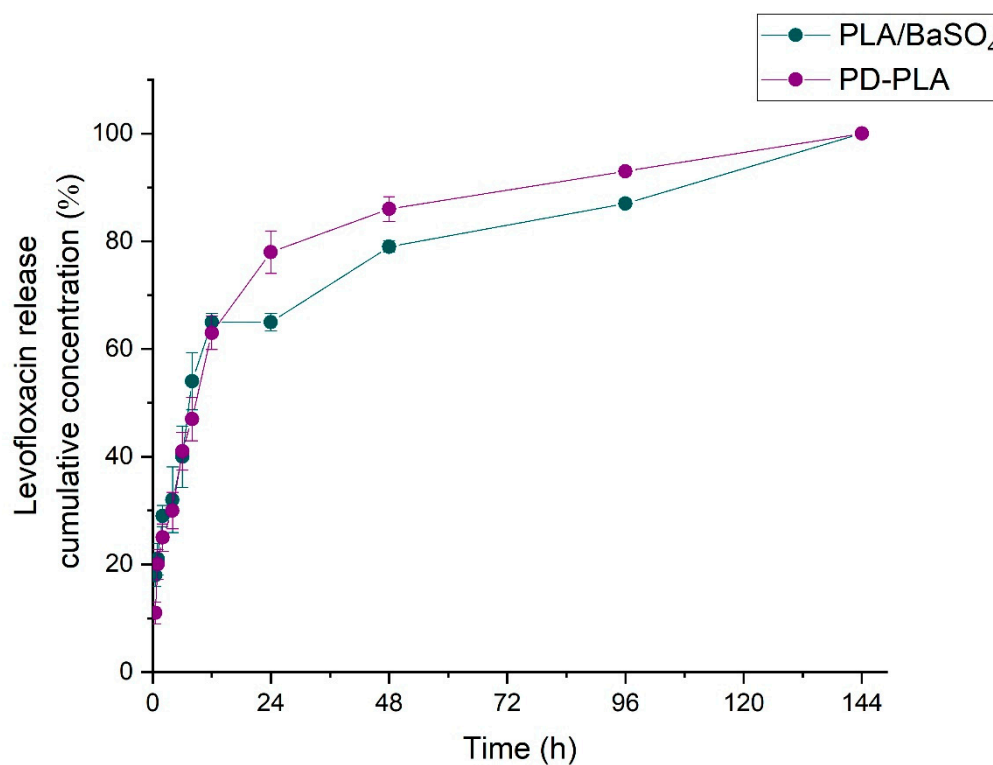

Figure S6. Release profiles over time of levofloxacin in neat PLA, PD-PLA and PLA/PD-BaSO<sub>4</sub>.

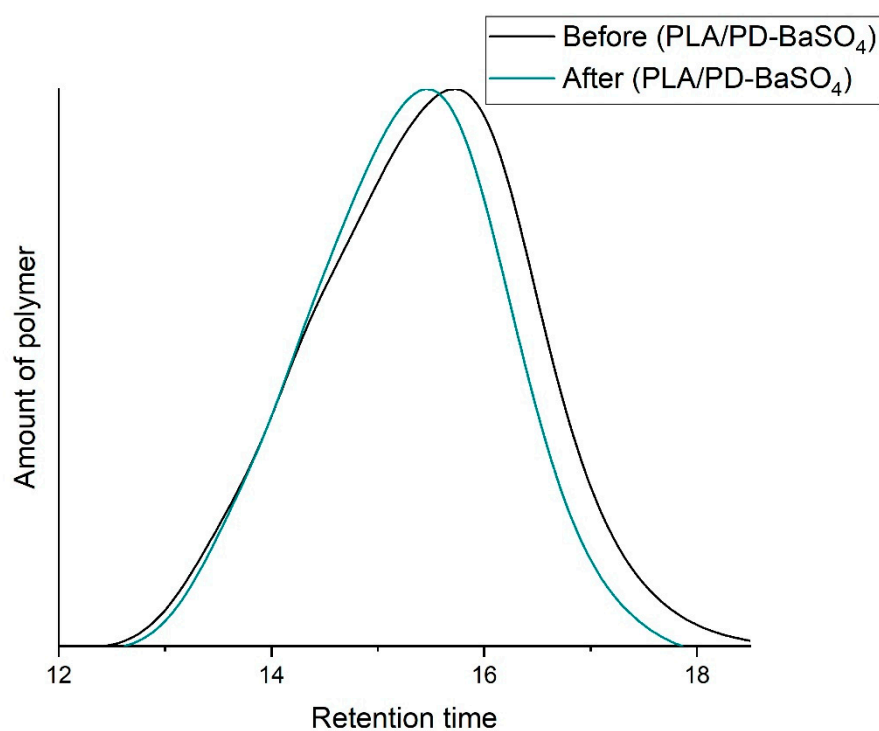

Figure S7. GPC refractive-index signals for PLA/PD-BaSO<sub>4</sub> before and after blending process at 200°C

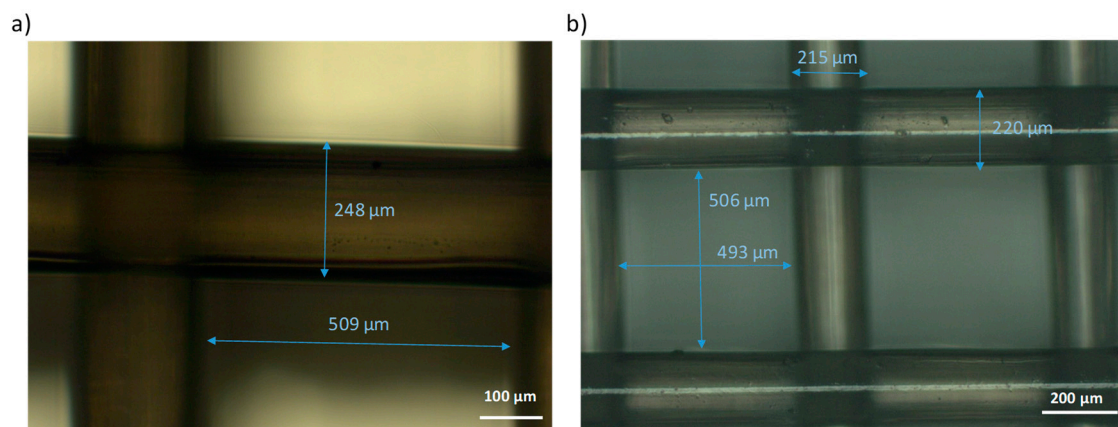

**Figure S8.** The microscopy image of PLA scaffold. a) x10 and b)X5

| Materials                                   | Metabolyc activity (%) |             |             |
|---------------------------------------------|------------------------|-------------|-------------|
|                                             | Day 1                  | Day 3       | Day 7       |
| 10 $\mu\text{g/ml}$ of $\text{BaSO}_4$      | $95 \pm 3$             | $97 \pm 1$  | $99 \pm 4$  |
| 50 $\mu\text{g/ml}$ of $\text{BaSO}_4$      | $94 \pm 1$             | $93 \pm 2$  | $95 \pm 3$  |
| 100 $\mu\text{g/ml}$ of $\text{BaSO}_4$     | $90 \pm 2$             | $92 \pm 3$  | $94 \pm 3$  |
| 500 $\mu\text{g/ml}$ of $\text{BaSO}_4$     | $90 \pm 2$             | $91 \pm 3$  | $94 \pm 2$  |
| 10 $\mu\text{g/ml}$ of PD- $\text{BaSO}_4$  | $89 \pm 5$             | $94 \pm 3$  | $95 \pm 4$  |
| 50 $\mu\text{g/ml}$ of PD- $\text{BaSO}_4$  | $86 \pm 4$             | $90 \pm 4$  | $92 \pm 3$  |
| 100 $\mu\text{g/ml}$ of PD- $\text{BaSO}_4$ | $89 \pm 3$             | $91 \pm 3$  | $93 \pm 3$  |
| 500 $\mu\text{g/ml}$ of PD- $\text{BaSO}_4$ | $83 \pm 5$             | $90 \pm 3$  | $91 \pm 3$  |
| TPC (control)                               | $100 \pm 1$            | $100 \pm 1$ | $100 \pm 2$ |
| PLA                                         | $100 \pm 1$            | $94 \pm 1$  | $100 \pm 1$ |
| PLA/ $\text{BaSO}_4$                        | $98 \pm 1$             | $100 \pm 1$ | $99 \pm 1$  |
| PLA/PD- $\text{BaSO}_4$                     | $100 \pm 1$            | $96 \pm 1$  | $98 \pm 1$  |

**Table S1.** Summary of the metabolic activity of the  $\text{BaSO}_4$  and PD- $\text{BaSO}_4$  particles as well as the materials PLA, PLA/  $\text{BaSO}_4$  and PLA/PD- $\text{BaSO}_4$ .
